# Supplementary material for: COVID-19 Alcoholic Cirrhosis and Non-Alcoholic Steatohepatitis Cirrhosis Outcomes among Hospitalized Patients in the United States: Insight from National Inpatient Sample Database
Source: MDPI journal article supplement (doi:10.3390/tropicalmed7120421), 2022-12-07
Supplement: s1 [file s1]

# Supplementary Materials for COVID-19 Alcoholic Cirrhosis and Non-Alcoholic Steatohepatitis Cirrhosis Outcomes among Hospitalized Patients in the United States: Insight from National Inpatient Sample Database

**Table S1.** ICD 10 codes.

| Variable                                              | ICD-10 CM Code                                                                                 |
|-------------------------------------------------------|------------------------------------------------------------------------------------------------|
| COVID                                                 | U071, U00, U49, U50, U85, J1282                                                                |
| Alcoholic liver cirrhosis                             | K70.3XX                                                                                        |
| NASH                                                  | K74.6XX, K75.81                                                                                |
| Hyponatremia                                          | E87.1                                                                                          |
| Portal HTN                                            | K76.6                                                                                          |
| Hepatorenal syndrome                                  | K76.7                                                                                          |
| Portal vein thrombosis                                | I81                                                                                            |
| SBP                                                   | K65.2                                                                                          |
| Variceal bleed                                        | I85.01, I85.11                                                                                 |
| Shock                                                 | R57.XX, R65.21                                                                                 |
| Hepatic encephalopathy                                | K72.01, K72.91                                                                                 |
| Smoking                                               | F17.XX, Z87.891                                                                                |
| CAD                                                   | I25.10, I25.11, I25.118, I25.119, I252, I253, I25.4XX, I25.5, I25.6, I25.8XX, I25.7XX, I25.9XX |
| CHF, HTN, DM, CKD, Chronic pulmonary disease, Obesity | Elixhauser comorbidities were used                                                             |
| AKI                                                   | N17.XX, N99.0                                                                                  |
| Variable                                              | ICD-10 procedure code                                                                          |
| Intubation                                            | 5A1945Z, 5A1955Z, 5A1935Z, 5A09357, 5A09457, 5A09557                                           |
| Vasopressor use                                       | 3E030XZ, 3E033XZ, 3E040XZ, 3E043XZ, 3E050XZ, 3E053XZ, 3E060XZ, 3E063XZ                         |
| Hemodialysis                                          | 5A1D70Z, 5A1D90Z, 5A1D80Z, 5A1D00Z, 5A1D60Z                                                    |

ICD codes used for different diagnosis.
